# Supplementary material for: Antioxidant Activity of Phenolic Extraction from Different Sweetpotato (Ipomoea batatas (L.) Lam.) Blades and Comparative Transcriptome Analysis Reveals Differentially Expressed Genes of Phenolic Metabolism in Two Genotypes
Source: MDPI journal article supplement (doi:10.3390/genes13061078), 2022-06-16
Supplement: s1 [file s1]

**Table S2.** Primers used in qRT-PCR

| <b>Gene ID</b> | <b>forward primers for q-RTPCR<br/>(5'-3')</b> | <b>reverse primers for q-RTPCR<br/>(5'-3')</b> |
|----------------|------------------------------------------------|------------------------------------------------|
| g10319         | TGTACTCGGTGAGGGAGG                             | AAACTAACATCCCTGGACTC                           |
| g24989         | GCTTTGTCCAATCCATGATC                           | CTCACGGAGCAACAAAATAG                           |
| g24990         | ACCATTGCCATTGTCAAC                             | CTGGGAGACAACAAAAGACA                           |
| g26782         | CCCACTAGCCTTTTTCCA                             | GCCTATGGTCCAACCAAG                             |
| g29801         | TGAACACTGCCCTGGACC                             | GCTTAGCTTAGCTTCCTGG                            |
| g29802         | ACTGCCATAGACCGCCTTA                            | ACGCTAAACCTCTCACACT                            |
| g34957         | TGCTTGTTCCCTAGCCTT                             | CCGCAGTACAAAACCTTG                             |
| g43253         | TTAACAAAGCCTTGCCG                              | ACAGTGCAACTCCAAGAAG                            |
| g553           | TCCCCAACTTCTCTCTCTCT                           | GAGCTGTGAGTAGCAAAGAG                           |
| g57987         | CTCTCCTCCCTGTTCTTCG                            | CACCATGCGCTTCACTTC                             |
| <i>IbACTIN</i> | CTGGTGTTATGGTTGGGATGG                          | GGGGTGCCTCGGTAAGAAG                            |
