# Supplementary material for: Antioxidant Activity of Phenolic Extraction from Different Sweetpotato (Ipomoea batatas (L.) Lam.) Blades and Comparative Transcriptome Analysis Reveals Differentially Expressed Genes of Phenolic Metabolism in Two Genotypes
Source: MDPI journal article supplement (doi:10.3390/genes13061078), 2022-06-16
Supplement: s1 [file s1]

**Table S4.** Up-regulated genes and annotation of the phenylpropanoid biosynthetic pathway

| Gene ID                                                              | Genes           | Enzyme ID     |
|----------------------------------------------------------------------|-----------------|---------------|
| g57987                                                               | <i>PAL</i>      | EC:4.3.1.24   |
| g26782                                                               | <i>HCT</i>      | EC:2.3.1.133  |
| g16725、g62049                                                        | <i>F5'H</i>     | EC:1.14.14    |
| g31303、g31304                                                        | <i>F3'H</i>     | EC:1.14.14.82 |
| g1027                                                                | <i>CHS</i>      | EC:2.3.1.74   |
| g3586                                                                | <i>CHI</i>      | EC:5.5.16     |
| g553、g43253                                                          | <i>CCoAOMT1</i> | EC:2.1.1.104  |
| g712、g29801、g29802、g34957                                            | <i>CAD</i>      | EC:1.1.1.195  |
| g10319                                                               | <i>4CL</i>      | EC:6.2.1.12   |
| g26014                                                               | <i>ALDH2C4</i>  | EC:1.2.1.68   |
| g1369                                                                | <i>UGT72E1</i>  | EC:2.4.1.111  |
| g1383                                                                | <i>UGT72E2</i>  | EC:2.4.1.111  |
| g18287、g1126、g24562、g17001、<br>g48738、g24563、g17013、g24561、<br>g8745 | <i>PRX52</i>    | EC:1.11.1.7   |
| g24989、g24990                                                        | <i>POD</i>      | EC:1.11.1.7   |
| g3595                                                                | <i>F12L6.8</i>  | EC:3.4.24.59  |
