# Supplementary material for: Antioxidant Activity of Phenolic Extraction from Different Sweetpotato (Ipomoea batatas (L.) Lam.) Blades and Comparative Transcriptome Analysis Reveals Differentially Expressed Genes of Phenolic Metabolism in Two Genotypes
Source: MDPI journal article supplement (doi:10.3390/genes13061078), 2022-06-16
Supplement: s1 [file s1]

**Table S1.** List of sweetpotato genotypes used

| Genotype  | Genotype   | Genotype  |
|-----------|------------|-----------|
| 160410    | 18-6-24    | Chaoshu1  |
| 170901    | CT1-13     | 18-6-1    |
| 18-2-18   | 18-1-1     | 18-2-21   |
| 18-2-4    | Shangshu19 | Wan1314-6 |
| 18-7-12   | 161010     | 18-6-43   |
| Zhongshu1 | Yushu1     | 18-11-5   |
| 18-6-47   | Ningzi4    | XN1408-4  |
| 161603    | 161614     |           |
