# Supplementary material for: Antioxidant Activity of Phenolic Extraction from Different Sweetpotato (Ipomoea batatas (L.) Lam.) Blades and Comparative Transcriptome Analysis Reveals Differentially Expressed Genes of Phenolic Metabolism in Two Genotypes
Source: MDPI journal article supplement (doi:10.3390/genes13061078), 2022-06-16
Supplement: s1 [file s1]

**Table S3.** Antioxidant activity,TPC and TFC of blade in different sweetpotato genotypes

| Genotypes  | TFC<br>(mg RE/g) | TPC<br>(mg GAE/g) | ABTS+<br>(mg TE/g) | DPPH·<br>(mg TE/g) | FRAP<br>(mg TE/g) |
|------------|------------------|-------------------|--------------------|--------------------|-------------------|
| 160410     | 4.91±0.81cdefg   | 11.80±2.00defg    | 22.52±2.34abc      | 9.54±2.60h         | 43.24±0.52cd      |
| 170901     | 4.94±1.00cdefg   | 9.01±2.63fgh      | 15.19±4.72cde      | 10.17±8.61gh       | 25.37±0.78ghij    |
| 18-2-18    | 4.91±1.49cdefg   | 7.86±1.80ghi      | 22.02±2.08abc      | 4.57±5.58ij        | 29.25±0.57fghi    |
| 18-2-4     | 6.22±1.28bc      | 15.44±3.65cde     | 26.82±8.27a        | 13.40±10.68ef      | 52.11±0.85bc      |
| 18-7-12    | 4.94±1.14cdefg   | 15.62±3.61cde     | 21.84±6.81abc      | 15.33±6.70cde      | 39.85±1.59de      |
| Zhongshu1  | 3.58±0.10fg      | 4.45±1.77hi       | 4.59±1.66f         | 5.73±2.41ij        | 10.60±1.39m       |
| 18-6-47    | 5.41±0.51cdef    | 11.92±2.97defg    | 11.94±4.06def      | 11.82±4.83fg       | 20.27±0.28ijkl    |
| 161603     | 3.66±0.13fg      | 4.26±1.23hi       | 7.26±2.53f         | 6.05±3.21ij        | 13.74±0.97klm     |
| 18-6-24    | 4.05±0.76efg     | 2.17±0.98i        | 4.87±1.83f         | 5.46±2.57ij        | 9.77±1.41m        |
| CT1-13     | 4.22±0.64defg    | 6.72±2.13ghi      | 9.44±2.90ef        | 6.33±3.87i         | 20.15±1.08ijkl    |
| 18-1-1     | 5.96±0.56bcd     | 17.3±6.33cde      | 19.58±3.63abc      | 14.02±3.22def      | 50.34±1.48bc      |
| Shangshu19 | 4.44±1.05cdefg   | 6.22±0.911ghi     | 5.23±1.054f        | 3.93±2.14j         | 9.64±0.56m        |
| 161010     | 4.73±0.56cdefg   | 11.28±2.59efg     | 17.64±3.46bcd      | 11.75±3.66fg       | 33.29±1.03efg     |
| Yushu1     | 7.16±0.49b       | 17.35±2.11bcd     | 24.84±3.33ab       | 13.32±7.09ef       | 55.62±2.05b       |
| Ningzi4    | 4.30±0.77defg    | 13.75±3.92cdef    | 17.80±3.59bcd      | 12.59±5.98f        | 23.71±0.51ghij    |
| 161614     | 5.58±0.14cde     | 15.29±1.79cde     | 27.13±6.00a        | 13.50±7.31ef       | 36.89±1.71def     |
| Chaoshu1   | 3.60±0.93fg      | 6.09±2.20ghi      | 6.99±2.36f         | 8.69±2.52h         | 10.01±1.24m       |
| 18-6-1     | 4.75±0.30cdefg   | 7.98±2.19ghi      | 11.98±2.54def      | 9.20±2.64h         | 17.48±1.54jklm    |
| 18-2-21    | 5.32±2.0cdef     | 22.50±3.92b       | 14.90±4.15cde      | 20.76±4.46a        | 24.93±0.89ghij    |
| Wan1314-6  | 10.73±2.0a       | 28.32±3.63a       | 25.10±2.48ab       | 15.93±5.40cd       | 85.51±2.13a       |
| 18-6-43    | 3.07±0.07g       | 5.23±1.3lhi       | 6.00±1.97f         | 4.66±2.71ij        | 12.51±1.07lm      |
| 18-11-5    | 5.42±0.51bcde    | 11.91±2.97bc      | 12.07±5.37def      | 18.55±3.42b        | 22.35±1.17hijk    |
| XN1408-4   | 6.04±0.12bcd     | 16.99±2.88bcde    | 22.10±5.61abc      | 16.36±6.01c        | 31.10±1.32efgh    |

**Note:**The same letters in same column indicated an insignificant mean difference; The different letters in same column different lower-case letters indicated that the mean difference reached a significant level of  $p \leq 0.05$ .
